# Supplementary material
Source: PubMed Central journal article supplement (PMC4087050)
Supplement: NIHMS604824-supplement-01.pdf [file NIHMS604824-supplement-01.pdf]

Figure 1. Good neurologic outcome of the out-of-hospital cardiac arrest patients treated with hypothermia, stratified by initial rhythm and duration of downtime

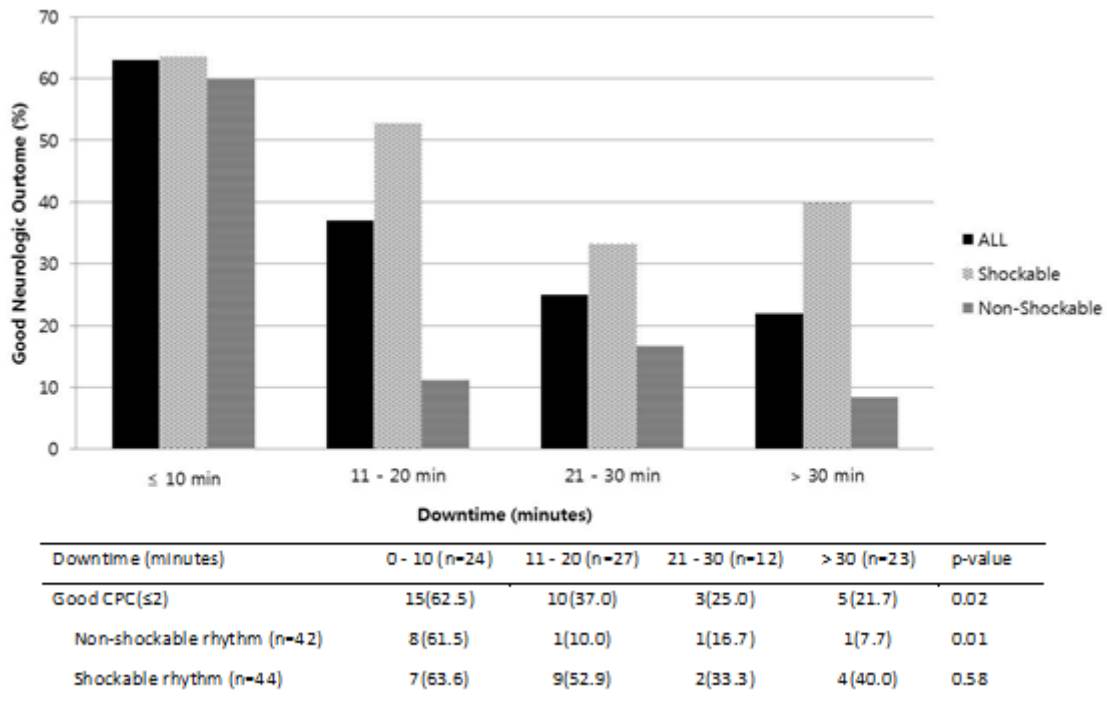

CPC, cerebral performance score, reported as median with interquartile range.
